# Supplementary material for: Building student capacity to lead sustainability transitions in the food system through farm-based authentic research modules in sustainability sciences (FARMS)
Source: Oxford University Press journal article supplement (doi:10.1525/elementa.239), 2017-01-01

**Figure S3. Abundance of Weed Type in a Tomato Cropping System on the Basis of Weed Suppression Treatment.** The abundance of weed type (grasses, lamb’s quarter, pigweed, and purslane) varied across the three weed suppression strategies in the tomato cropping system.

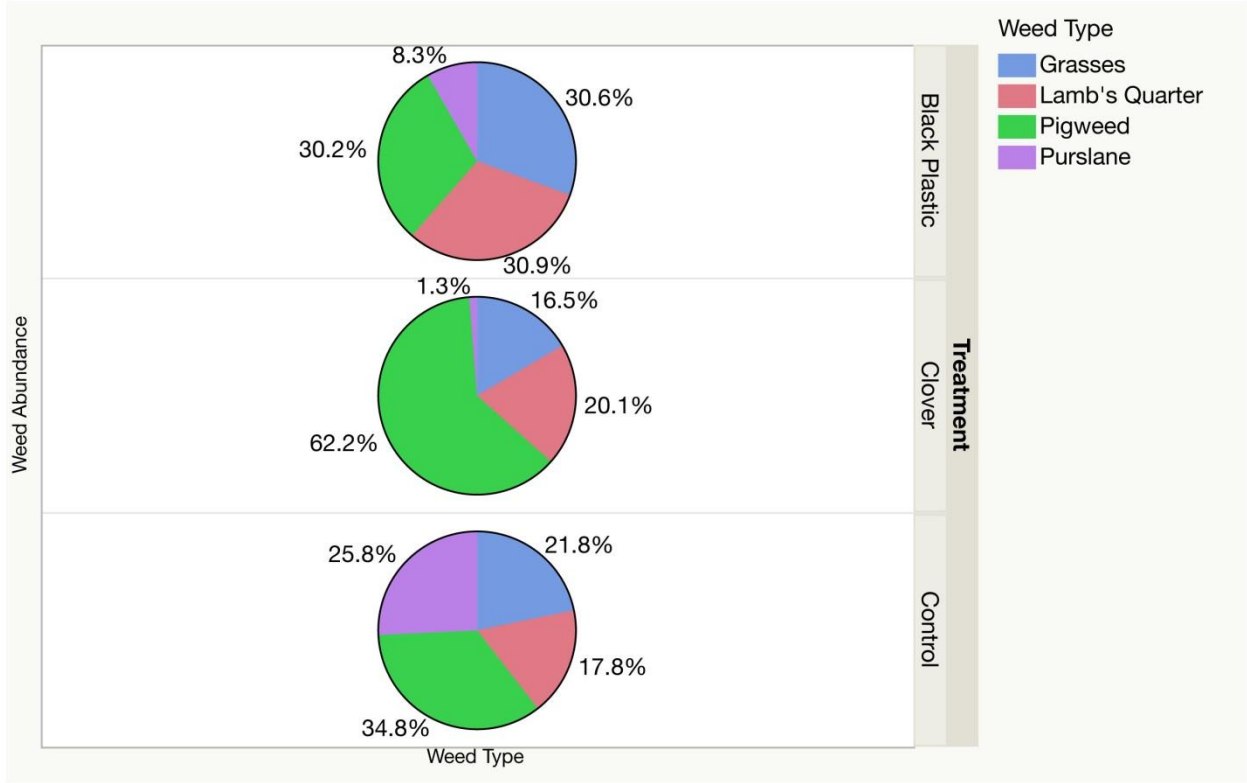

Supplement: elementa-5-239-s3.pdf [file elementa-5-239-s3.pdf]
